# Supplementary material
Source: Research Square preprint supplement (doi:10.21203/rs.3.rs-9982773/v1)

Graphical abstract:

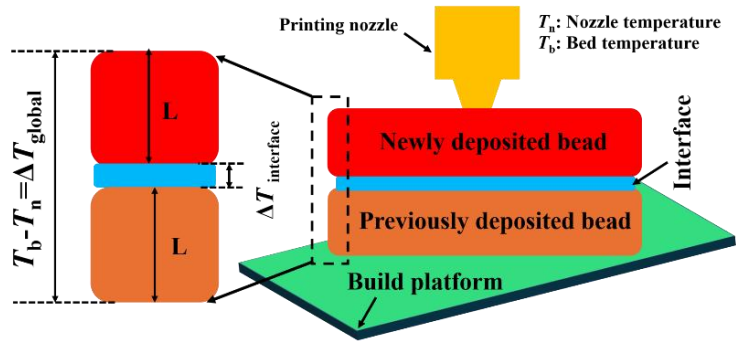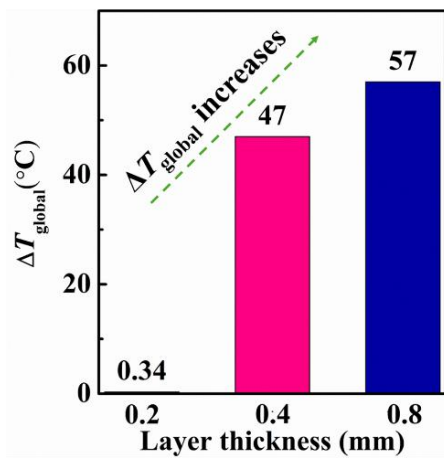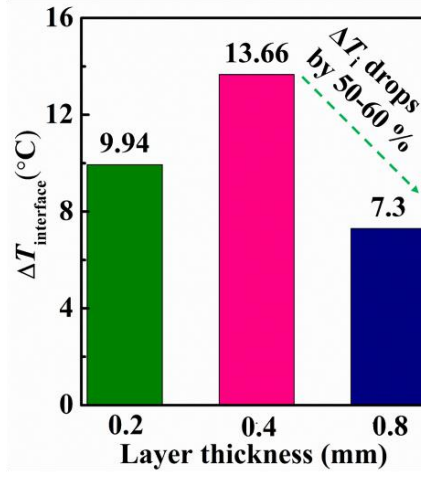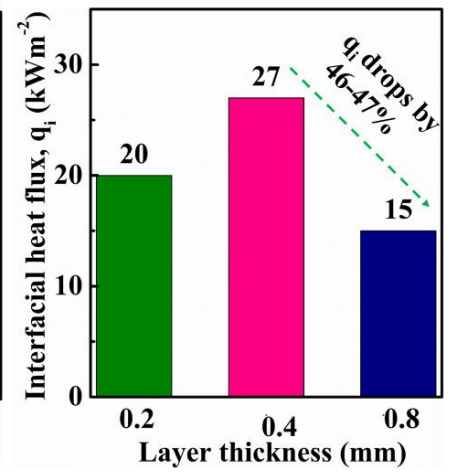

Supplement: Supplementary file 1 [file 92a6555407c98c3b0c801a45.pdf]
